# Supplementary material for: Optimal Population-Level Infection Detection Strategies for Malaria Control and Elimination in a Spatial Model of Malaria Transmission
Source: PubMed Central journal article supplement (PMC4713231; doi:10.1371/journal.pcbi.1004707), 2016-01-14
Supplement: pcbi.1004707.s003.pdf [file pcbi.1004707.s003.pdf]

**A**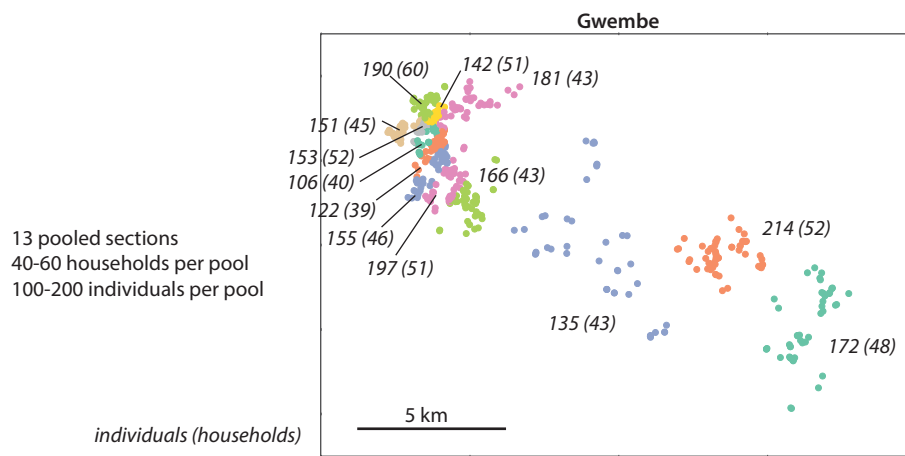**B**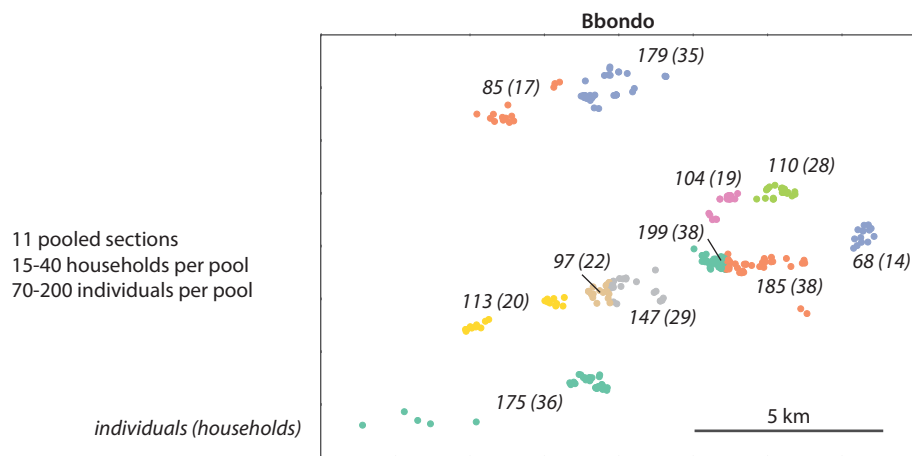

Figure S3. Neighborhood pools used for pooled PCR testing in (A) Gwembe HFCA and (B) Bbondo HFCA.
